# Supplementary material for: Adult-population incidence of severe sepsis in Australian and New Zealand intensive care units
Source: Springer Nature journal article supplement (doi:10.1007/s00134-004-2157-0), 2004-03-30
Supplement: supp.pdf [file supp.pdf]

## **ESM**

### **Author affiliations:**

Alfred Hospital, Melbourne, Australia: Andrew Davies,  
Auckland Hospital, New Zealand, Colin MacArthur, Lynette Newby  
Austin Hospital, Melbourne, Australia: Rinaldo Bellomo, Donna Wise  
Blacktown Hospital, New South Wales, Australia: Graham Reece,  
Cabrini Hospital, Melbourne, Australia: Felicity Hawker, Lorisa Soloveychik  
Canberra Hospital, ACT, Australia: James Nicholls,  
Christchurch Hospital, New Zealand, Seton Henderson,  
Flinders Medical Centre, Adelaide, Australia: Andrew Bersten, Tamara Hunt  
Geelong Hospital, Victoria, Australia: David Green,  
Gold Coast Hospital, Queensland, Australia: Brent Richards, Stuart Green  
Hornsby Hospital, New South Wales, Australia: Tom Solano,  
Liverpool Hospital, New South Wales, Australia: Arthas Flabouris,  
MIS Consultants, New South Wales, Australia: Lesley Francis (Statistician)  
Princess Alexandra Hospital, Queensland, Australia: Chris Joyce, Anthony Limpus  
Royal Brisbane Hospital, Brisbane, Australia: Jeff Lipman,  
Royal Hobart Hospital, Hobart, Australia: Andrew Turner,  
Royal North Shore Hospital, Sydney, Australia: Simon Finfer, Vladimir Szachin, Maria Magnaye  
Royal Perth Hospital, Perth, Australia: Geoff Dobb, Eileen MacKenzie, Gordon Morris  
Royal Prince Alfred Hospital, Sydney, Australia: Imogen Mitchell,  
Sir Charles Gairdner Hospital, Western Australia: Vernon Van Heerden, Brigitte Roberts  
St. George Hospital, Sydney, Australia: Michael O'Leary,  
Western Hospital, Melbourne, Australia: Craig French,

### **Author Contributions:**

#### **Study concept and design:**

Simon Finfer, Rinaldo Bellomo, Geoffrey Dobb, Jeffrey Lipman, Colin McArthur, John Myburgh, Michael O'Leary

#### **Acquisition of data:**

Rinaldo Bellomo, Andrew Bersten, Bronwyn Couchman, Andrew Davies, Geoffrey Dobb, Arthas Flabouris, Craig French, Donna Goldsmith, David Green, Stuart Green, Felicity Hawker, P. V van Heerden, Seton Henderson, Tamara Hunt, Christopher Joyce, Anthony Limpus, Jeffrey Lipman, Maria Magnaye, Colin McArthur, Imogen Mitchell, Gordon Morris, Lynette Newby, James Nickells, Michael O'Leary, Dorrilyn Rajbhandari, Graham Reece, Brent Richards, Brigit Roberts, Janet Roberts, Vladimir Sazhin, Thomas Solano, Larisa Soloveychik, Andrew Turner

Analysis and interpretation of data:

Simon Finfer, Lesley Francis, Rinaldo Bellomo, Craig French, Jeffrey Lipman, John Myburgh

Drafting of the manuscript:

Simon Finfer, Rinaldo Bellomo, Craig French, Jeffrey Lipman, John Myburgh

Critical revision of the manuscript for important intellectual content:

Rinaldo Bellomo, Andrew Bersten, Bronwyn Couchman, Andrew Davies, Geoffrey Dobb, Arthas Flabouris, Lesley Francis, Craig French, Donna Goldsmith, David Green, Stuart Green, Felicity Hawker, P. V van Heerden, Seton Henderson, Tamara Hunt, Christopher Joyce, Anthony Limpus, Jeffrey Lipman, Maria Magnaye, Colin McArthur, Imogen Mitchell, John Myburgh, Lynette Newby, James Nickells, Michael O'Leary, Dorrilyn Rajbhandari, Graham Reece, Brent Richards, Brigit Roberts, Janet Roberts, Vladimir Sazhin, Thomas Solano, Larisa Soloveychik, Andrew Turner

Statistical expertise:

Lesley Francis, Simon Finfer, John Myburgh, Vladimir Sazhin

Obtained funding: Simon Finfer, Jeffrey Lipman

Administrative, technical or material support:

Bronwyn Couchman, Geoffrey Dobb, Arthas Flabouris, Craig French, Donna Goldsmith, Felicity Hawker, Christopher Joyce, Anthony Limpus, Jeffrey Lipman, Colin McArthur, Gordon Morris, John Myburgh, Graham Reece, Brent Richards, Janet Roberts, Andrew Turner

Study Supervision:

Rinaldo Bellomo, Geoffrey Dobb, Arthas Flabouris, Craig French, Seton Henderson, Christopher Joyce, Colin McArthur, Michael O'Leary, Graham Reece, Larisa Soloveychik

Acknowledgement:

We thank Graeme Rocker (Halifax, Nova Scotia, Canada) for reviewing and advising on an earlier draft of the manuscript, and Eileen MacKenzie for her role in acquisition of data at Royal Perth Hospital

Funding:

Statistical analysis was funded by an unrestricted educational grant from Eli Lilly (Australia) Pty. Ltd. Eli Lilly played no role in the design or conduct of the study, in data collection, analysis or interpretation. Eli Lilly (Australia) Pty. Ltd. did not reviewed or approved the manuscript.
